# Supplementary material
Source: publisher figshare collection journal article supplement (https://acs.figshare.com/ndownloader/files/4013278)
Supplement: Supplementary file 1 [file 4013278]

SUPPORTING INFORMATION FOR:

# Push-pull acylo-phosphine oxides for two-photon induced polymerization

Rashid Nazir †, Paulius Danilevicius ‡, David Gray‡, Maria Farsari, ‡\* Daniel T. Gryko †\*

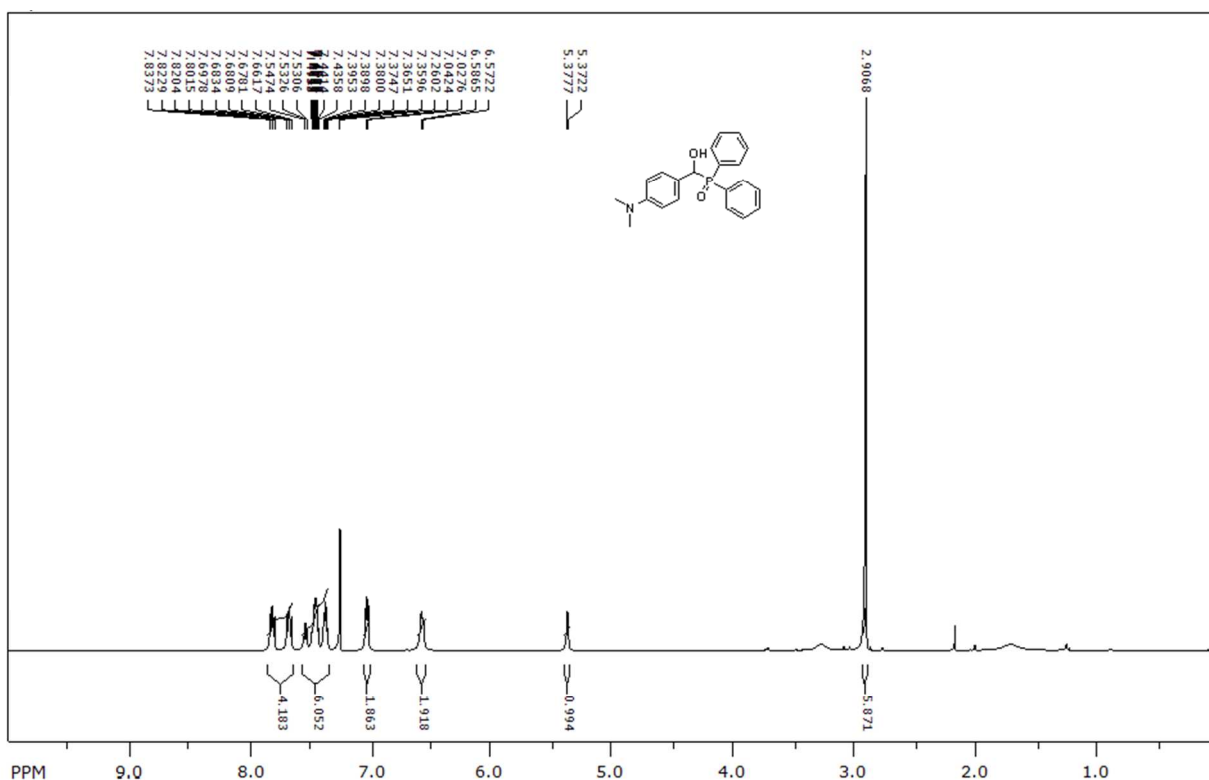

Figure 1. <sup>1</sup>H NMR spectrum of 2b in CDCl<sub>3</sub>

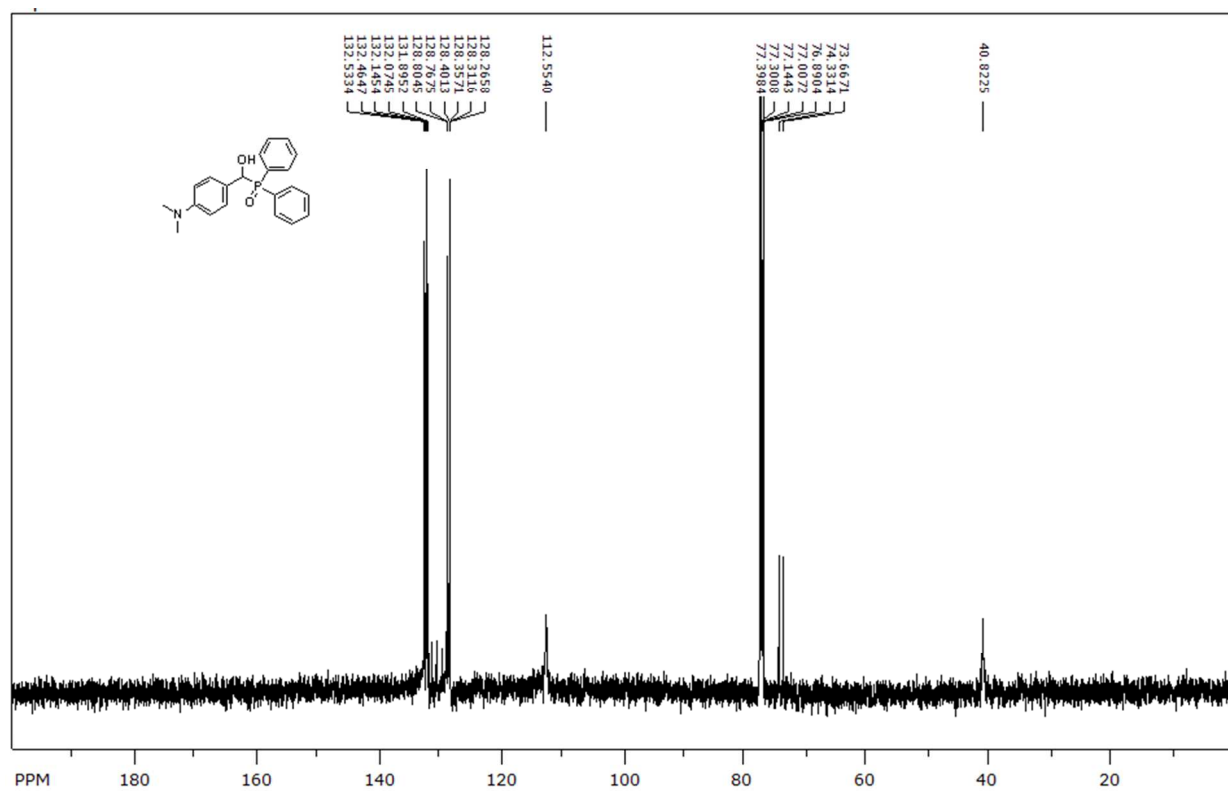

Figure 2.  $^{13}\text{C}$  NMR spectrum of 2b in  $\text{CDCl}_3$

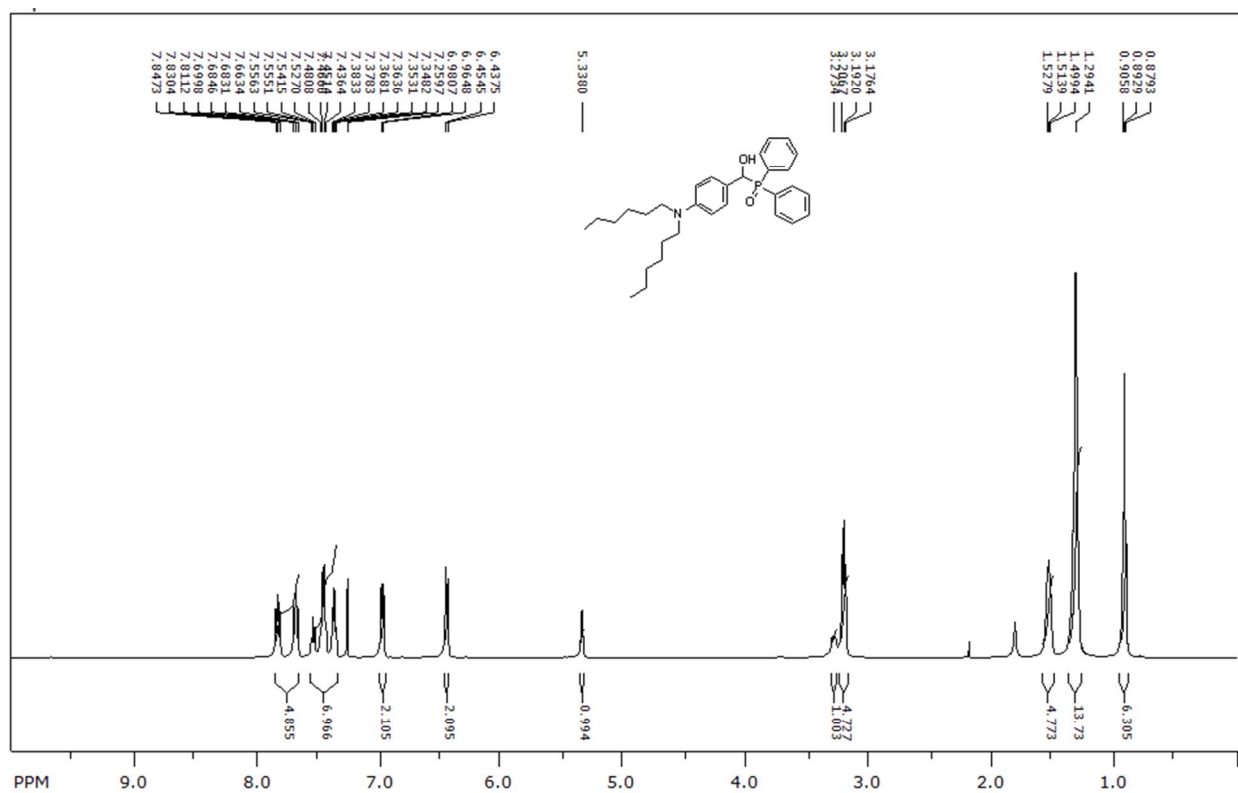

Figure 3. <sup>1</sup>H NMR spectrum of 2c in CDCl<sub>3</sub>

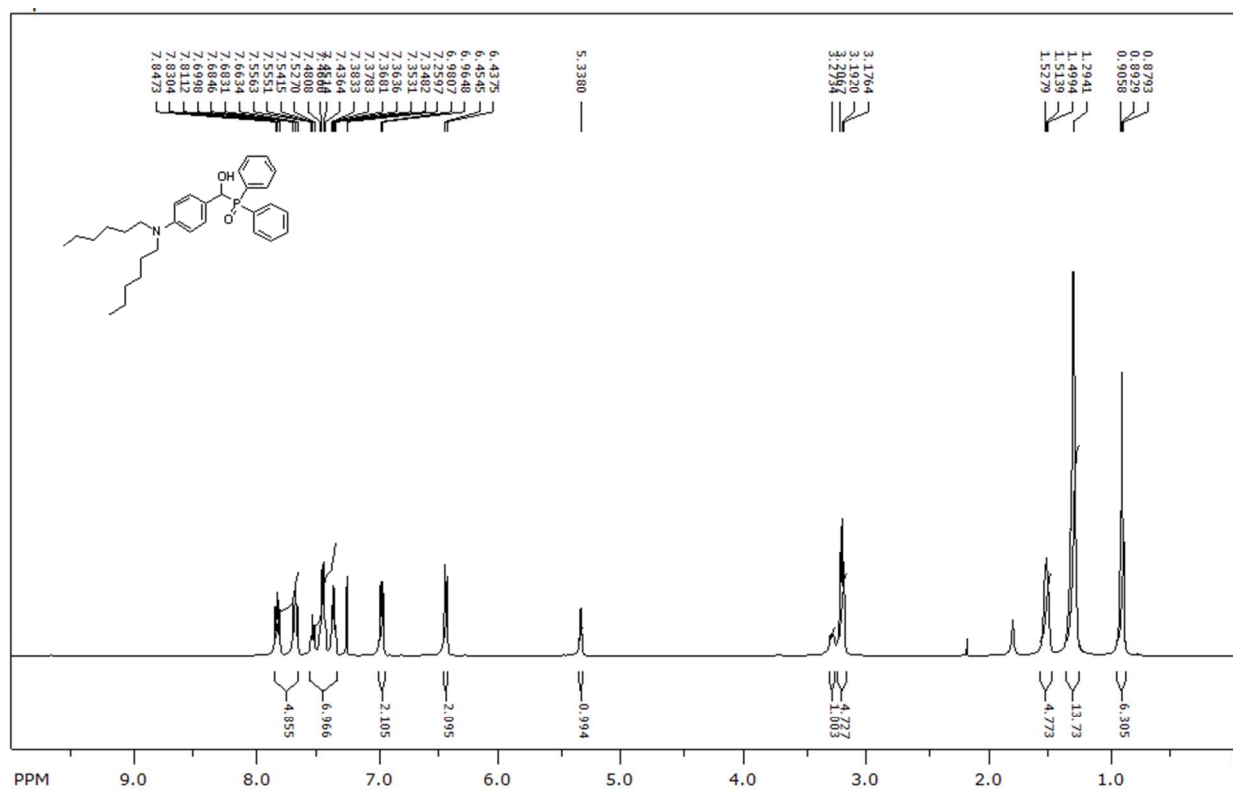

Figure 4.  $^{13}\text{C}$  NMR spectrum of 2c in  $\text{CDCl}_3$

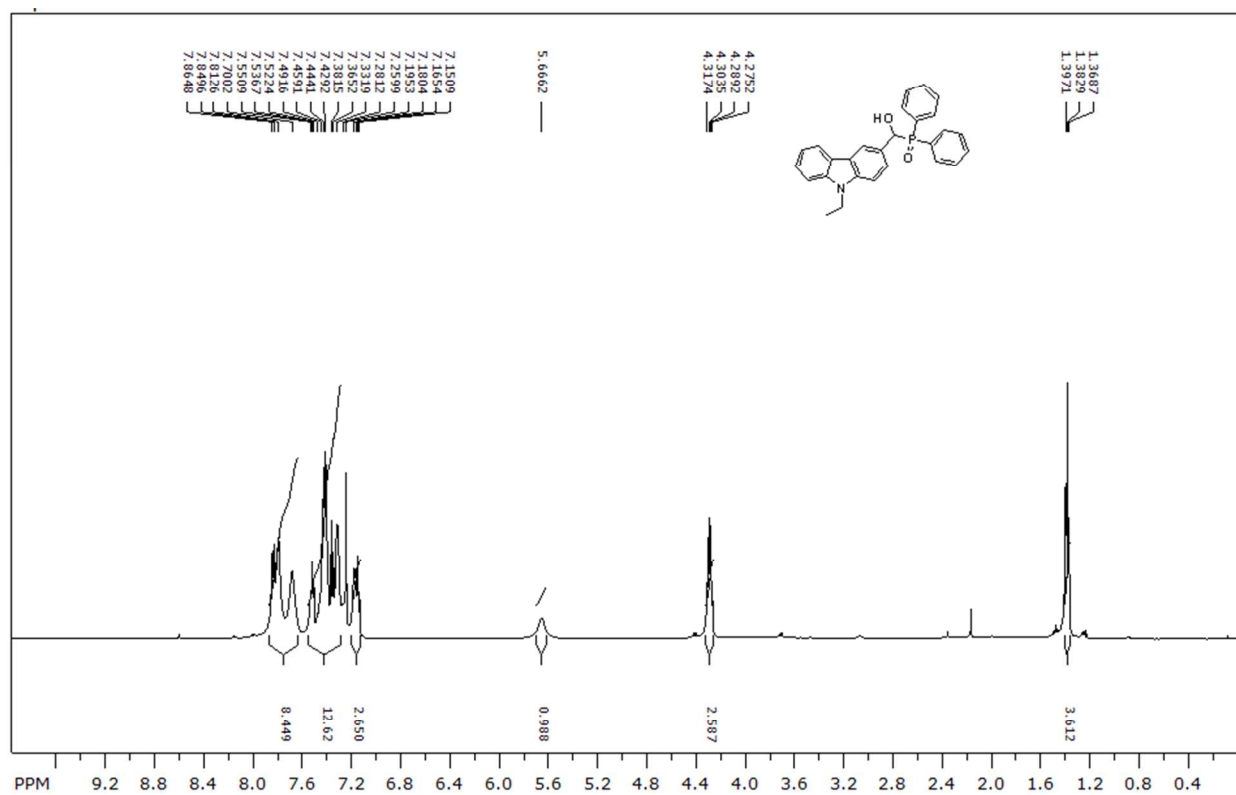

Figure 5. <sup>1</sup>H NMR spectrum of 2d in CDCl<sub>3</sub>

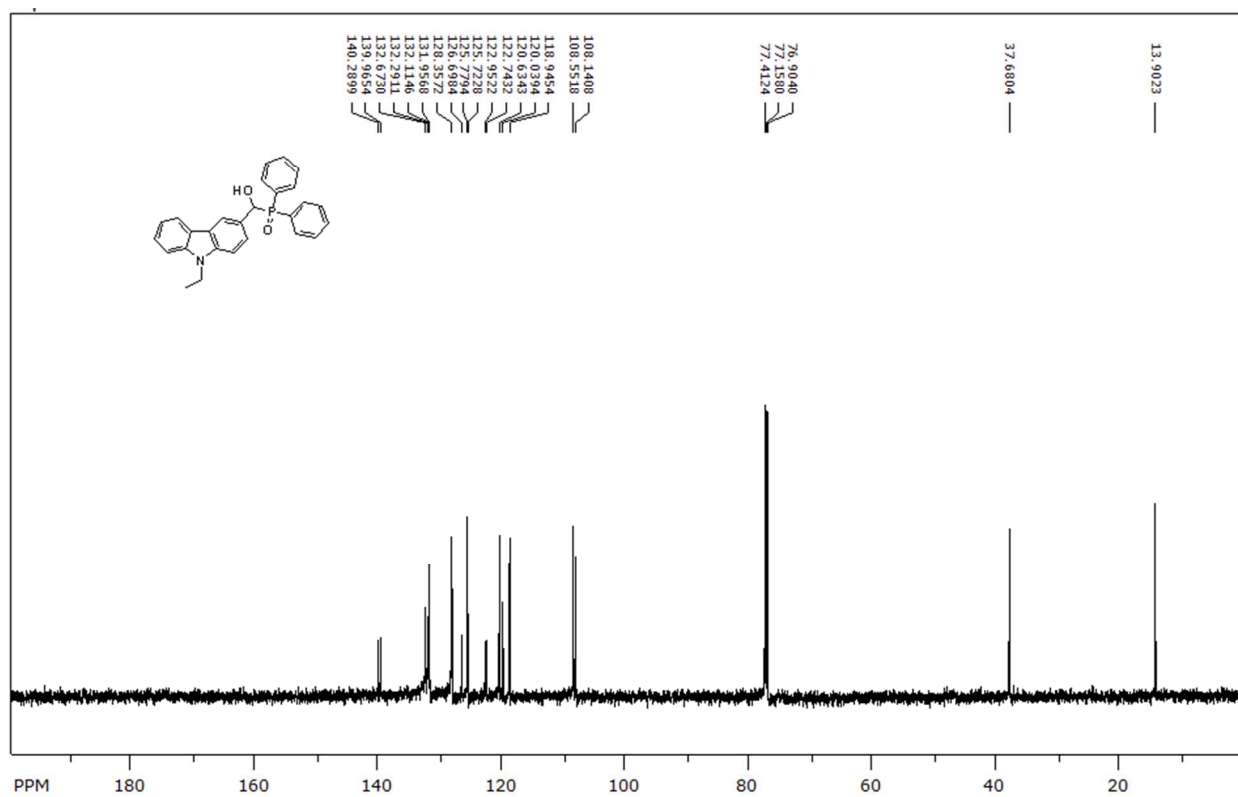

Figure 6.  $^{13}\text{C}$  NMR spectrum of 2d in  $\text{CDCl}_3$

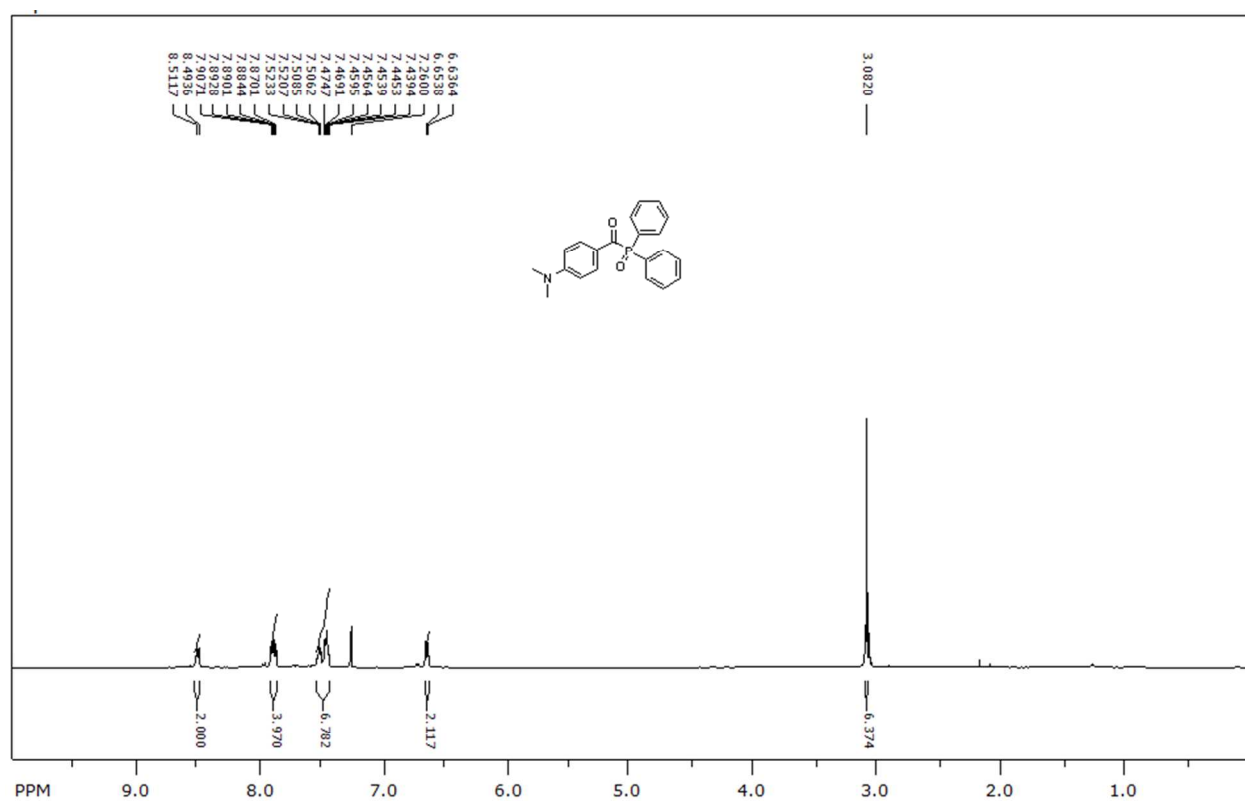

Figure 7. <sup>1</sup>H NMR spectrum of 3b in CDCl<sub>3</sub>

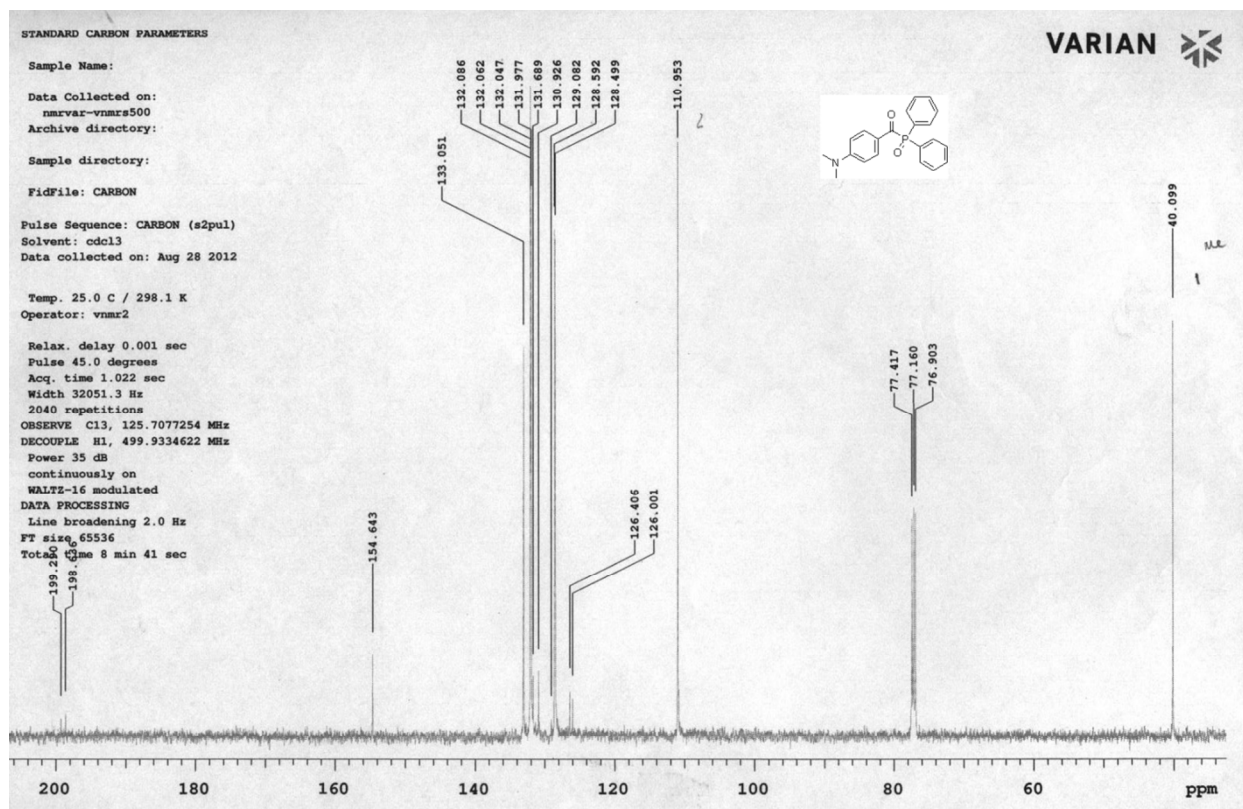

Figure 8.  $^{13}\text{C}$  NMR spectrum of 3b in  $\text{CDCl}_3$

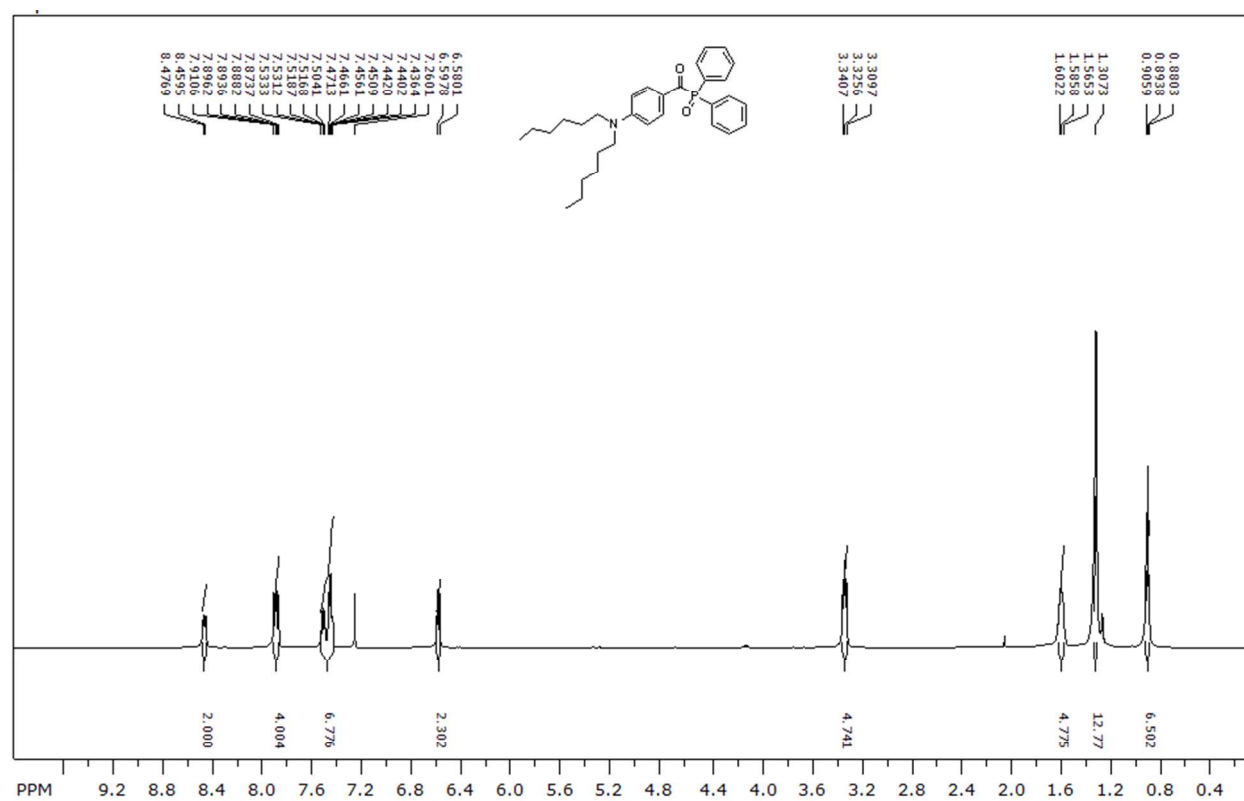

Figure 9. <sup>1</sup>H NMR spectrum of 2c in CDCl<sub>3</sub>

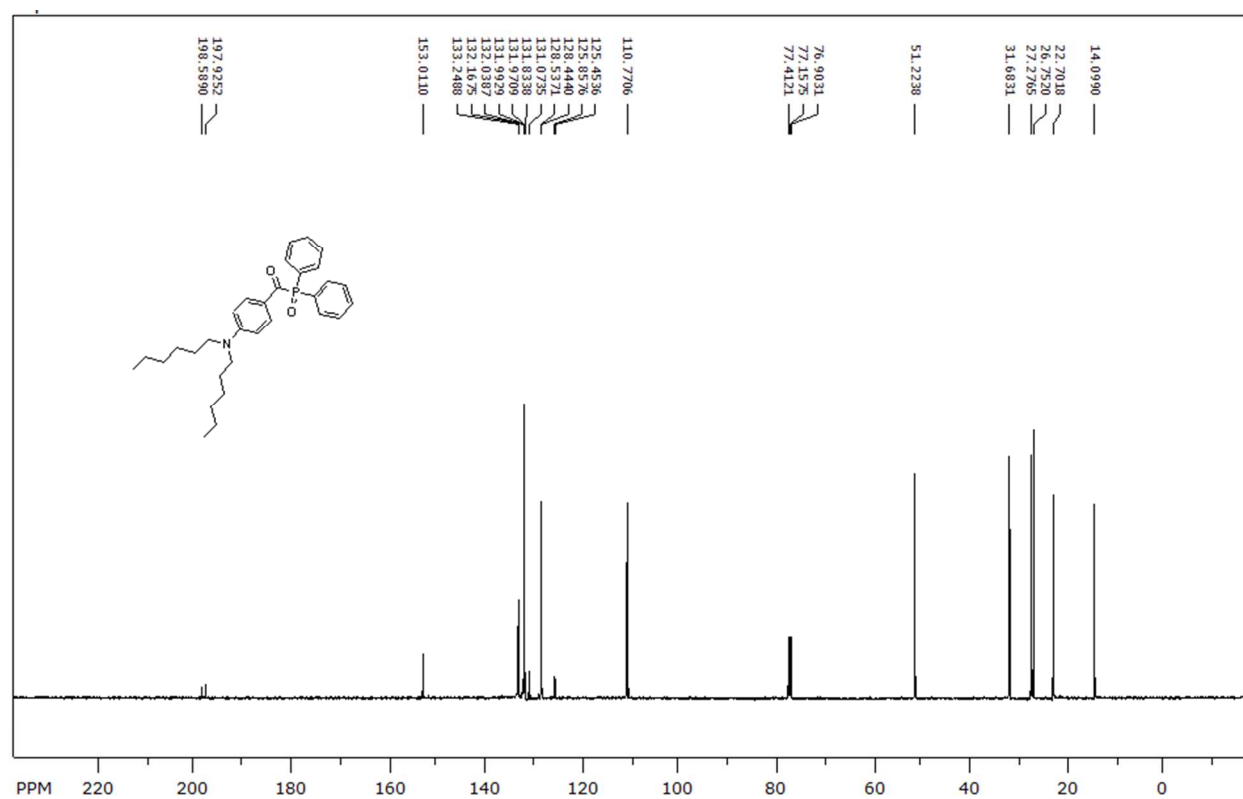

Figure 10.  $^{13}\text{C}$  NMR spectrum of 3c in  $\text{CDCl}_3$

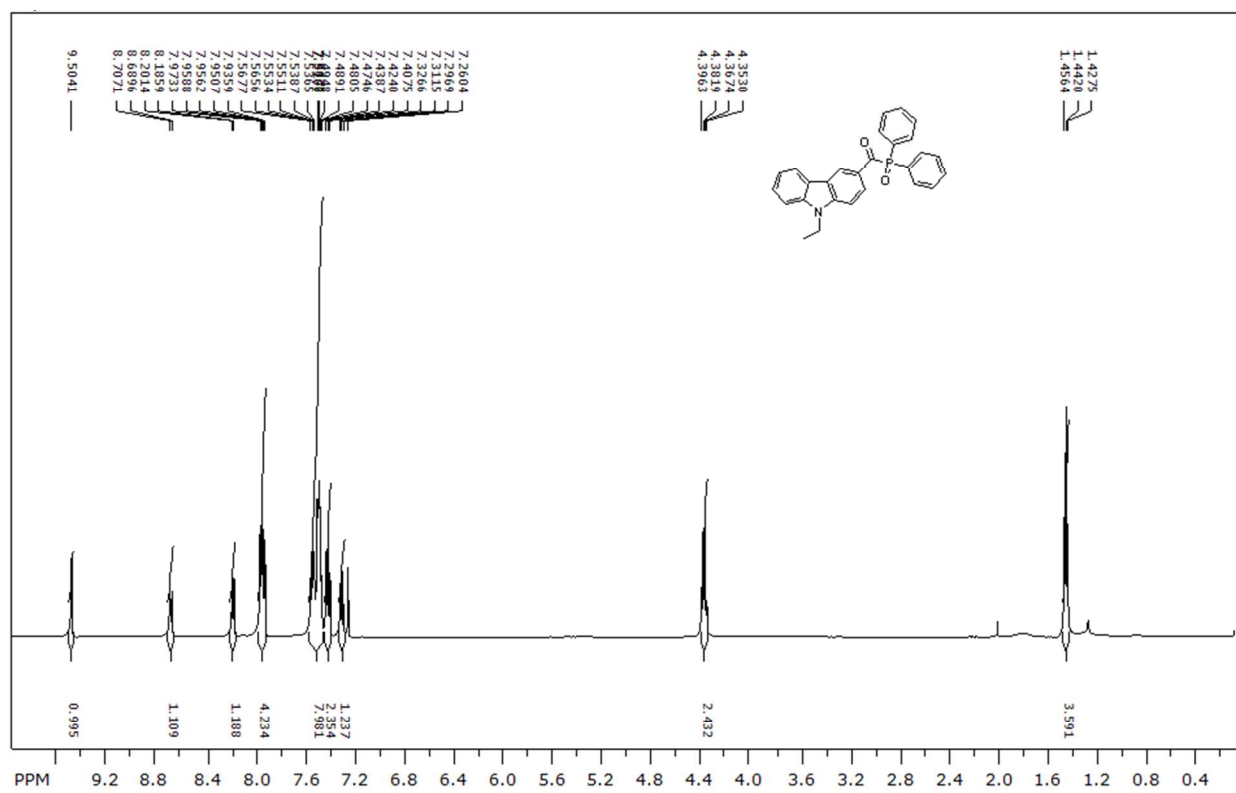

Figure 11. <sup>1</sup>H NMR spectrum of 3d in CDCl<sub>3</sub>

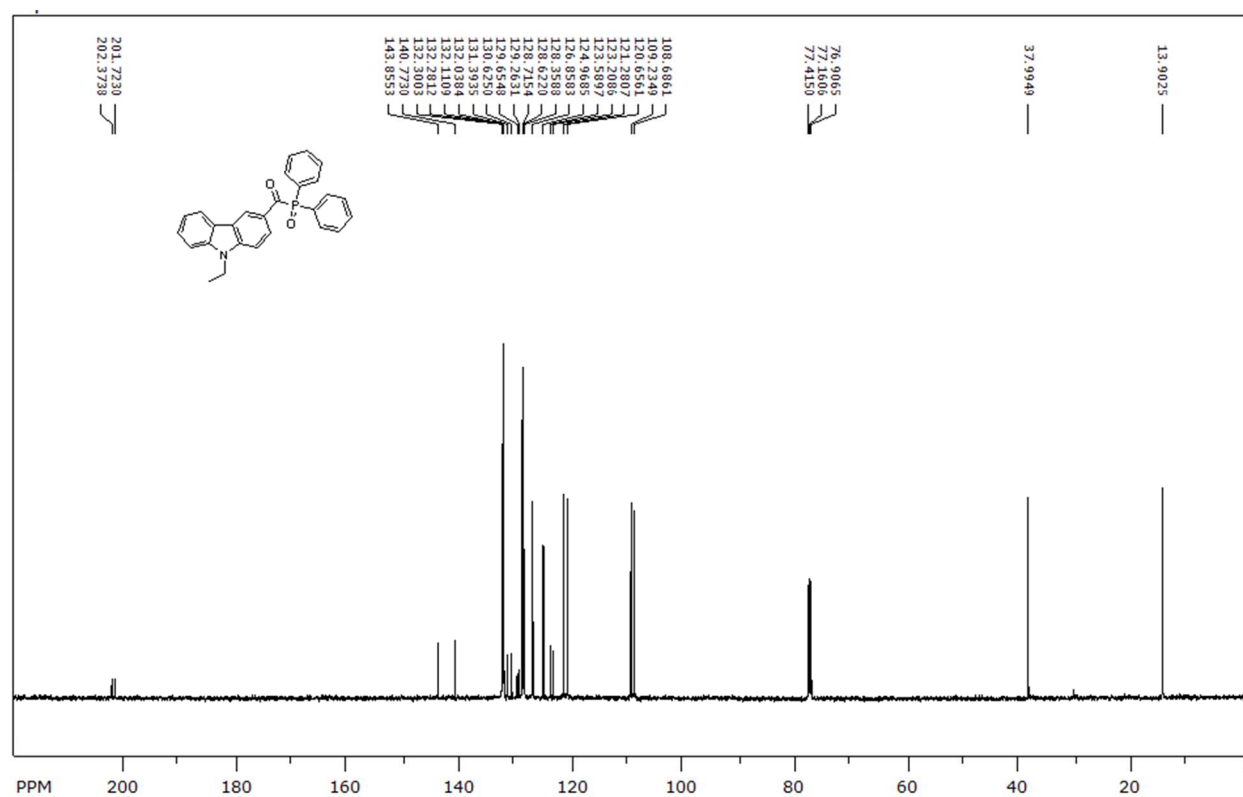

Figure 12.  $^{13}\text{C}$  NMR spectrum of 3d in  $\text{CDCl}_3$
